# Supplementary material
Source: PubMed Central journal article supplement (PMC7017390)
Supplement: NIHMS1532332-supplement-1.pdf [file NIHMS1532332-supplement-1.pdf]

## Supplemental Tables

| Gene         | 1 (Up in AD80) / 2 (Low in AD30) | Log2 Fold change | Gene      | 1 (Up in AD80) / 2 (Low in AD30) | Log2 Fold change | Gene    | 1 (Up in AD80) / 2 (Low in AD30) | Log2 Fold change |
|--------------|----------------------------------|------------------|-----------|----------------------------------|------------------|---------|----------------------------------|------------------|
| G6PC         | 1                                | 8.262795         | SYT8      | 1                                | 3.826244         | SPATA9  | 1                                | 3.10268          |
| ADH1B        | 1                                | 7.508264         | ADH4      | 1                                | 3.800391         | SPTSSB  | 1                                | 3.093815         |
| RNU1-70P     | 1                                | 6.596403         | WNT8B     | 1                                | 3.799741         | CYP26A1 | 1                                | 3.093672         |
| CYP7A1       | 1                                | 6.56167          | TNFSF10   | 1                                | 3.795007         | ACR     | 1                                | 3.092358         |
| ADH1A        | 1                                | 6.358759         | HMGCS2    | 1                                | 3.791218         | DUOX2   | 1                                | 3.090622         |
| SLC2A2       | 1                                | 6.05681          | GNAT1     | 1                                | 3.737262         | SPTLC3  | 1                                | 3.086353         |
| TNFRSF14-AS1 | 1                                | 6.055208         | CFHR4     | 1                                | 3.732386         | FER1L5  | 1                                | 3.081569         |
| IGFALS       | 1                                | 5.825777         | BSND      | 1                                | 3.718276         | RASA4CP | 1                                | 3.080765         |
| LINC00957    | 1                                | 5.727226         | TSPOAP1   | 1                                | 3.709555         | DOC2GP  | 1                                | 3.057021         |
| TTBK1        | 1                                | 5.724558         | SLC22A7   | 1                                | 3.698323         | VAT1L   | 1                                | 3.051293         |
| CYP3A43      | 1                                | 5.674953         | AOC4P     | 1                                | 3.68655          | FMO3    | 1                                | 3.031314         |
| UGT1A9       | 1                                | 5.643359         | HNF4A-AS1 | 1                                | 3.679788         | SFRP5   | 1                                | 3.016623         |
| APOL3        | 1                                | 5.448612         | FHAD1     | 1                                | 3.665007         | RFX6    | 1                                | 3.015833         |
| VCAM1        | 1                                | 5.442271         | ADAMTS10  | 1                                | 3.61034          | SLC5A8  | 2                                | 3.015901         |
| BFSP2        | 1                                | 5.396028         | NUDT13    | 1                                | 3.562774         | LFNG    | 2                                | -3.01667         |
| C22orf31     | 1                                | 5.349548         | FYTTD1P1  | 1                                | 3.544783         | CXCR4   | 2                                | -3.0544          |
| FOXN1        | 1                                | 5.19046          | CHAD      | 1                                | 3.534052         | GPR3    | 2                                | -3.099           |
| A2MP1        | 1                                | 5.186347         | IRF5      | 1                                | 3.517716         | PA2G4P6 | 2                                | 3.103813         |
| UROC1        | 1                                | 5.056845         | GSTA7P    | 1                                | 3.504839         | PRDM8   | 2                                | 3.140796         |
| XAF1         | 1                                | 5.053767         | CXCL10    | 1                                | 3.486513         | DGKG    | 2                                | 3.261431         |
| ADAMTS14     | 1                                | 5.049252         | SERPINA2  | 1                                | 3.481204         | BCAN    | 2                                | 3.389266         |
| UGT1A8       | 1                                | 5.048674         | WDR93     | 1                                | 3.475799         | MMP10   | 2                                | 3.411248         |
| TTLL11-IT1   | 1                                | 4.965854         | MAP6      | 1                                | 3.465613         | MYBPC3  | 2                                | 3.492397         |
| HRC          | 1                                | 4.853162         | MOV10L1   | 1                                | 3.457172         | MUC12   | 2                                | -3.55192         |
| MOGAT2       | 1                                | 4.797347         | HP        | 1                                | 3.456436         | FGF18   | 2                                | 3.551928         |

|               |   |          |               |   |          |                 |   |               |
|---------------|---|----------|---------------|---|----------|-----------------|---|---------------|
| SEPT7P9       | 1 | 4.735573 | MT1B          | 1 | 3.43852  | MYO1G           | 2 | -<br>3.623007 |
| RAB20         | 1 | 4.724476 | CASR          | 1 | 3.414598 | ANKRD61         | 2 | -<br>3.631953 |
| THAP12P5      | 1 | 4.722978 | PKLR          | 1 | 3.406793 | CLIC1P1         | 2 | -<br>3.773794 |
| ANGPTL1       | 1 | 4.713348 | PRR18         | 1 | 3.406115 | SPRY4           | 2 | -<br>3.779795 |
| FGL2          | 1 | 4.703365 | LHX9          | 1 | 3.399799 | SERPINE1        | 2 | -<br>-3.88183 |
| ALDOB         | 1 | 4.690513 | HSD3BP4       | 1 | 3.398646 | CASC19          | 2 | -<br>3.936024 |
| ADRA2A        | 1 | 4.672076 | SORCS3        | 1 | 3.397736 | IL11            | 2 | -<br>-3.95162 |
| DSEL          | 1 | 4.670563 | LINC01482     | 1 | 3.381454 | RASL10A         | 2 | -<br>3.956945 |
| RARRES3       | 1 | 4.667278 | LINC01948     | 1 | 3.376557 | LRRC36          | 2 | -<br>3.995257 |
| CYP3A7        | 1 | 4.666613 | SIM1          | 1 | 3.375678 | IRF6            | 2 | -<br>4.030169 |
| NPR1          | 1 | 4.60485  | ARHGAP4       | 1 | 3.351453 | KRT8P22         | 2 | -<br>4.154856 |
| TBPL2         | 1 | 4.584333 | S1PR1         | 1 | 3.346809 | SRP72P2         | 2 | -<br>4.155968 |
| CPS1          | 1 | 4.535074 | GNG5P2        | 1 | 3.339409 | CCDC158         | 2 | -<br>4.162351 |
| GLULP3        | 1 | 4.486344 | MAT1A         | 1 | 3.336921 | KRT23           | 2 | -<br>-4.18144 |
| ACOT12        | 1 | 4.483677 | ABCC9         | 1 | 3.316358 | RERG            | 2 | -<br>4.263313 |
| LINC01900     | 1 | 4.472706 | PLG           | 1 | 3.315311 | BCRP2           | 2 | -<br>4.288376 |
| ASTN2-<br>AS1 | 1 | 4.421647 | TRHDE-<br>AS1 | 1 | 3.302828 | SLC12A9-<br>AS1 | 2 | -<br>4.290656 |
| LINC00671     | 1 | 4.330812 | SCARA5        | 1 | 3.277119 | SCOCP1          | 2 | -<br>4.406725 |
| COL6A4P2      | 1 | 4.315634 | DPYS          | 1 | 3.266763 | PKD1L2          | 2 | -<br>4.407059 |
| CASP16P       | 1 | 4.23705  | INHBC         | 1 | 3.24724  | KRT8P25         | 2 | -<br>4.407511 |
| CHRNE         | 1 | 4.232659 | BBOX1         | 1 | 3.22843  | KRT8P1          | 2 | -<br>-4.40821 |
| FUZ           | 1 | 4.202595 | C8B           | 1 | 3.215234 | C9orf84         | 2 | -<br>4.409531 |
| C1orf141      | 1 | 4.198172 | PLIN5         | 1 | 3.209913 | PTPN2P1         | 2 | -<br>-4.41104 |
| CYP8B1        | 1 | 4.194463 | ITIH1         | 1 | 3.193375 | EBF1            | 2 | -<br>4.412159 |
| ADH1C         | 1 | 4.14962  | RORB          | 1 | 3.18897  | KLHDC7A         | 2 | -<br>4.418122 |

|            |   |          |           |   |          |           |   |               |
|------------|---|----------|-----------|---|----------|-----------|---|---------------|
| ITIH3      | 1 | 4.123324 | LINC02068 | 1 | 3.186516 | IFIT1P1   | 2 | -<br>4.425365 |
| CYP1B1-AS1 | 1 | 4.115127 | S100A1    | 1 | 3.185405 | HCAR2     | 2 | -<br>4.626337 |
| KLHL1      | 1 | 4.06833  | LINC02499 | 1 | 3.164759 | SYN3      | 2 | -<br>4.647241 |
| AOX3P      | 1 | 4.057007 | C6        | 1 | 3.162615 | SLC27A6   | 2 | -<br>4.826887 |
| PKHD1L1    | 1 | 3.965088 | MLXIPL    | 1 | 3.153884 | SBSPON    | 2 | -<br>4.838843 |
| LPA        | 1 | 3.961606 | FTCD      | 1 | 3.143456 | SHC3      | 2 | -<br>4.921064 |
| CYP3A4     | 1 | 3.945235 | BGLAP     | 1 | 3.141819 | MEOX2     | 2 | -<br>5.005146 |
| C2orf54    | 1 | 3.931918 | HOGA1     | 1 | 3.137846 | CRISP3    | 2 | -<br>5.160243 |
| IP6K3      | 1 | 3.928574 | LINC01767 | 1 | 3.129923 | PTPN7     | 2 | -<br>5.184175 |
| GSN-AS1    | 1 | 3.921159 | C4A       | 1 | 3.12356  | CGA       | 2 | -<br>5.334937 |
| CFHR2      | 1 | 3.889435 | GOLGA2P5  | 1 | 3.119704 | PPY       | 2 | -<br>5.352692 |
| APCS       | 1 | 3.881737 | DPEP1     | 1 | 3.119402 | OTOF      | 2 | -<br>5.533359 |
| ALDH1L1    | 1 | 3.860795 | CLEC14A   | 1 | 3.11721  | LINC01121 | 2 | -<br>5.587001 |
| ACTL7B     | 1 | 3.83416  | CD22      | 1 | 3.114028 | L1CAM     | 2 | -<br>5.742864 |
| CFHR1      | 1 | 3.826663 | ROBO2     | 1 | 3.106367 |           |   |               |

**Supplemental Table 1: AD80 signature genes from RNA-seq experiments that were used for Kaplan Meier and Box Plots.**

| Kinase                                  | AD80<br>1µM | Kinase        | AD80<br>1µM | Kinase              | AD80<br>1µM | Kinase            | AD80<br>1µM | Kinase          | AD80<br>1µM | Kinase                | AD80<br>1µM | Kinase                            | AD80<br>1µM | Kinase                            | AD80<br>1µM |
|-----------------------------------------|-------------|---------------|-------------|---------------------|-------------|-------------------|-------------|-----------------|-------------|-----------------------|-------------|-----------------------------------|-------------|-----------------------------------|-------------|
| ABL,<br>ARG                             | 51.0        | CDK9          | 1.6         | FRAP                | -12.6       | KHS2              | 60.3        | MAST1,<br>MAST2 | 6.6         | p38a                  | -11.7       | PKN1                              | 5.9         | SRPK1                             | -5.3        |
| ABL,<br>ARG                             | 22.0        | CHED          | 23.6        | FRK                 | 51.5        | KSR1,<br>KSR2     | 6.1         | MAST3           | 3.5         | p38d, p38g            | 71.2        | PKN2                              | 2.3         | SRPK1,<br>SRPK2                   | 3.6         |
| ACK                                     | 7.6         | CHK1          | -23.4       | FRK                 | 25.4        | LATS1             | 6.7         | MAST4           | -1.4        | p70S6K                | -3.0        | PKR                               | -2.3        | STLK3                             | -19.5       |
| AMPKa1                                  | 14.5        | CHK2          | 2.4         | FYN,<br>SRC,<br>YES | 33.1        | LATS1             | 1.0         | MASTL           | -2.0        | p70S6K,<br>p70S6Kb    | 1.7         | PKR                               | -14.4       | STLK5                             | -3.0        |
| AMPKa1,<br>AMPKa2                       | 2.3         | CHK2          | -18.2       | GAK                 | -29.6       | LATS2             | 4.2         | MASTL           | 6.7         | p70S6Kb               | -0.7        | PLK1                              | 6.1         | STLK6                             | 14.1        |
| AMPKa1,<br>AMPKa2                       | -5.2        | CK1a          | 0.5         | GCK                 | 75.6        | LATS2             | -0.9        | MET             | 13.6        | PAN3                  | -16.8       | PLK1                              | -8.0        | STLK6                             | 6.8         |
| ANPb                                    | -19.5       | CK1d,<br>CK1e | -13.4       | GCK                 | 71.1        | LKB1              | -7.9        | MLK3            | 32.0        | PCTAIRE1              | 5.9         | PRP4                              | -8.3        | TAK1                              | 62.2        |
| ARAF                                    | -21.7       | CK1g1         | -10.2       | GCN2                | -2.6        | LOK               | -9.2        | MPSK1           | -19.2       | PCTAIRE1,<br>PCTAIRE3 | 26.2        | PRP4                              | 2.5         | TAO1,<br>TAO3                     | 2.5         |
| ATR                                     | 2.9         | CK1g2         | -2.7        | GCN2                | -8.9        | LYN               | 50.6        | MPSK1           | -28.6       | PCTAIRE2              | 26.8        | PRPK                              | -10.1       | TAO2                              | 12.7        |
| AurA                                    | 54.4        | CK2a1         | 0.2         | GPRK5               | 3.5         | LYN               | 62.9        | MSK1<br>domain1 | -13.3       | PCTAIRE2,<br>PCTAIRE3 | 29.2        | RAF1                              | 16.6        | TBK1                              | 0.2         |
| AurA                                    | 52.3        | CK2a2         | -23.4       | GSK3A               | -4.7        | MAP2K1            | 1.8         | MSK2<br>domain1 | 14.2        | PEK                   | 0.6         | ROCK1                             | -18.7       | TGFbR2                            | -14.5       |
| AurA,<br>AurB,<br>AurC                  | 64.8        | CLK1          | -8.1        | GSK3B               | 1.3         | MAP2K1,<br>MAP2K2 | -0.6        | MST1            | 36.1        | PFTAIRE1              | 47.8        | ROCK1,<br>ROCK2                   | 7.2         | TLK1                              | 3.4         |
| AurB                                    | 81.1        | CLK2          | 2.2         | HER2/<br>ErbB2      | -4.5        | MAP2K1,<br>MAP2K2 | -12.9       | MST1,<br>MST2   | 24.6        | PFTAIRE1              | 39.4        | RSK1<br>domain1                   | 32.6        | TLK1                              | -4.7        |
| BARK1                                   | -10.3       | CLK3          | 4.1         | HER2/<br>ErbB2      | -15.6       | MAP2K3            | 2.5         | MST2            | 44.8        | PHKg2                 | -5.7        | RSK1<br>domain1                   | 15.9        | TLK2                              | -6.7        |
| BRAF                                    | -12.8       | CRK7          | 6.1         | HER3/<br>ErbB3      | -5.7        | MAP2K3            | -3.0        | MST3            | 36.1        | PI4K2B                | -11.6       | RSK1/<br>RSK2/<br>RSK3<br>domain1 | 3.6         | TLK2                              | -13.1       |
| CaMK1a                                  | -8.2        | CSK           | -2.3        | HER3/<br>ErbB3      | -24.6       | MAP2K4            | 4.5         | MST3            | 26.3        | PI4KA,<br>PI4KAP2     | -13.6       | RSK1<br>domain2                   | -4.6        | ULK1                              | -6.3        |
| CaMK1a                                  | -14.4       | CSK           | -5.0        | HSER                | -8.9        | MAP2K4            | -13.9       | MST4            | -11.5       | PI4KB                 | 4.7         | RSK2<br>domain1                   | 11.1        | ULK3                              | -6.7        |
| CaMK2a,<br>CaMK2b,<br>CaMK2d,<br>CaMK2g | -0.3        | DNAPK         | 8.2         | IKKa                | 8.5         | MAP2K5            | 32.9        | MST4,<br>YSK1   | 38.8        | PI4KB                 | -20.5       | RSK2<br>domain1                   | -7.1        | ULK3                              | 2.3         |
| CaMK2d                                  | -7.1        | DNAPK         | -15.1       | IKKb                | -9.1        | MAP2K5            | 33.0        | NDR1            | 0.1         | PIK3C3                | -23.4       | RSK2<br>domain1                   | 12.4        | VRK2                              | -24.8       |
| CaMK2g                                  | -3.6        | eEF2K         | 6.4         | IKKb                | -22.7       | MAP2K6            | 2.3         | NDR1            | -9.0        | PIK3CB                | -1.4        | RSK2<br>domain1                   | 6.4         | Wnk1,<br>Wnk2,<br>Wnk3            | 2.0         |
| CaMKK2                                  | -15.3       | EGFR          | -2.3        | IKKe,<br>TBK1       | 22.2        | MAP2K6            | -9.0        | NDR2            | 10.5        | PIP4K2A               | -10.1       | RSK2<br>domain2                   | -10.1       | Wnk1,<br>Wnk2,<br>Wnk4            | -11.5       |
| CASK                                    | -19.5       | EGFR          | -0.3        | ILK                 | -5.5        | MAP2K7            | 3.7         | NDR2            | 1.5         | PIP4K2C               | 2.9         | RSKL1                             | -18.5       | Wnk4                              | 14.6        |
| CDC2                                    | -8.1        | EphA2         | 85.2        | ILK                 | -2.2        | MAP3K1            | 42.0        | NEK1            | -10.3       | PIP4K2C               | -1.5        | SGK                               | 0.9         | YANK3                             | 5.8         |
| CDC2                                    | -0.4        | EphA2         | 89.3        | IRAK1               | 14.9        | MAP3K2            | 31.4        | NEK3            | -6.2        | PIP5K3                | -18.3       | SGK3                              | -19.5       | YES                               | 50.8        |
| CDK10                                   | 2.3         | EphB4         | 81.8        | IRAK4               | 8.3         | MAP3K2,<br>MAP3K3 | 10.2        | NEK4            | 4.9         | PITSLRE               | -11.2       | SGK3                              | -8.3        | ZAK                               | 20.4        |
| CDK11,<br>CDK8                          | 22.4        | Erk1          | -1.9        | IRAK4               | 17.3        | MAP3K4            | 1.3         | NEK6,<br>NEK7   | 0.7         | PKCa,<br>PKCb         | 10.7        | SLK                               | 16.9        | ZC1/HGK                           | 2.0         |
| CDK2                                    | 1.1         | Erk2          | 1.1         | IRE1                | -3.2        | MAPKAPK3          | 12.3        | NEK7            | 18.3        | PKCi                  | -8.6        | SLK                               | 3.0         | ZC1/HGK,<br>ZC2/TNIK,<br>ZC3/MINK | 6.8         |

|      |       |      |      |                        |       |                 |       |       |       |               |       |      |       |          |     |
|------|-------|------|------|------------------------|-------|-----------------|-------|-------|-------|---------------|-------|------|-------|----------|-----|
| CDK2 | 5.8   | Erk3 | 0.9  | JAK1                   | -16.2 | MARK1,<br>MARK2 | -6.1  | NEK9  | 12.5  | PKCi          | -16.4 | SMG1 | -7.8  | ZC2/TNIK | 6.1 |
| CDK5 | 8.4   | Erk5 | 6.6  | JAK1<br>domain2        | 19.8  | MARK2           | -14.3 | NEK9  | 12.7  | PKD1          | -0.2  | SMG1 | -5.3  |          |     |
| CDK5 | -11.3 | FAK  | 88.2 | JAK1<br>domain2        | 29.7  | MARK2,<br>MARK3 | -2.2  | NuaK1 | -2.3  | PKD1,<br>PKD2 | -1.8  | SNRK | -8.2  |          |     |
| CDK6 | 8.8   | FER  | 46.2 | JNK1,<br>JNK2,<br>JNK3 | 26.6  | MARK3           | 0.8   | NuaK1 | 13.2  | PKD2          | -13.4 | SNRK | -12.7 |          |     |
| CDK7 | 14.3  | FER  | 30.9 | KHS1                   | 81.4  | MARK3,<br>MARK4 | -0.3  | OSR1  | -17.3 | PKD3          | -10.4 | SRC  | 4.9   |          |     |
| CDK7 | -13.3 | FES  | 1.1  | KHS2                   | 69.4  | MARK4           | -5.8  | p38a  | 11.7  | PKD3          | 1.5   | SRC  | 8.2   |          |     |

**Supplemental Table 2: Kinativ mass spectroscopy profiling on HUH7 lysates with AD80.**

Percent inhibition of ATP-biotin probe labeling on kinase active site lysines measured at 1  $\mu$ M compound, quantified by targeted mass spectrometry. Kinases with multiple entries possess more than one active site lysine that can be probe labeled and detected. Experiments were completed in duplicated and performed at ActivX ([www.kinativ.com](http://www.kinativ.com)).

|                                 | APS<br>5-86-1 | APS<br>5-86-2 | APS<br>6-60-1 | APS<br>6-60-2 | APS<br>6-60-3 | AD58 | AD80 | Sorafe-<br>nib |
|---------------------------------|---------------|---------------|---------------|---------------|---------------|------|------|----------------|
| ABL2 (Arg)                      | 76            | 78            | 32            | 48            | 26            | 77   | 56   | 9              |
| AURKA<br>(Aurora A)             | 83            | 82            | 75            | 67            | 73            | 99   | 76   | 6              |
| AURKB<br>(Aurora B)             | 88            | 89            | 64            | 59            | 41            | 103  | 87   | 38             |
| AURKC<br>(Aurora C)             | 59            | 64            | 68            | 26            | 43            | 93   | 58   | 9              |
| EPHA2                           | 98            | 98            | 86            | 87            | 11            | 33   | 94   | 21             |
| EPHB4                           | 98            | 99            | 80            | 97            | 3             | 34   | 88   | 5              |
| FRK (PTK5)                      | 99            | 100           | 79            | 98            | 24            | 89   | 90   | 19             |
| LYN A                           | 95            | 97            | 75            | 95            | 40            | 101  | 88   | 28             |
| MAP4K2<br>(GCK)                 | 81            | 84            | 28            | 72            | -3            | 61   | 69   | 0              |
| MAP4K5<br>(KHS1)                | 104           | 103           | 94            | 95            | 61            | 103  | 103  | 38             |
| MAPK11<br>(p38 beta)            | 21            | 29            | 18            | 32            | 12            | 13   | 12   | -4             |
| MAPK12<br>(p38<br>gamma)        | 87            | 89            | 36            | 36            | 3             | 20   | 80   | 6              |
| MAPK13<br>(p38 delta)           | 66            | 71            | 41            | 45            | 5             | 13   | 12   | -4             |
| MAPK14<br>(p38 alpha)<br>Direct | 16            | 13            | 9             | 19            | 4             | -8   | -1   | 46             |
| MAPK14<br>(p38 alpha)           | 11            | 9             | 5             | 11            | 15            | 14   | 2    | 11             |
| PTK2 (FAK)                      | 95            | 93            | 29            | 25            | 7             | 67   | 87   | 10             |
| YES1                            | 94            | 95            | 51            | 89            | 37            | 99   | 77   | 4              |
| CDK14<br>(PFTK1)/<br>cyclin Y   | 100           | 100           | 97            | 102           | 37            |      |      | 78             |

**Supplemental Table 3: Percent inhibition measured in cell-free assays using recombinant, purified kinases.** Assays were conducted using 1  $\mu$ M compound and completed in duplicate. Inhibition values are normalized to DMSO controls.
